# Supplementary material for: Cobalt(ii)/nickel(ii) separation from sulfate media by solvent extraction with an undiluted quaternary phosphonium ionic liquid
Source: Royal Society of Chemistry journal article supplement (doi:10.1039/c7ra04753c), 2017-01-01
Supplement: c7ra04753c1.pdf [file c7ra04753c1.pdf]

*Supporting information*

**Cobalt(II)/nickel(II) separation from sulfate media by solvent extraction with an undiluted quaternary phosphonium ionic liquid**

Bieke Onghena,<sup>a</sup> Stijn Valgaeren<sup>a</sup>, Tom Vander Hoogerstraete<sup>a</sup> and Koen Binnemans<sup>a</sup>

<sup>a</sup> KU Leuven, Department of Chemistry, Celestijnenlaan 200F, P.O. Box 2404, B-3001 Heverlee, Belgium.

Email: Koen.Binnemans@kuleuven.be.

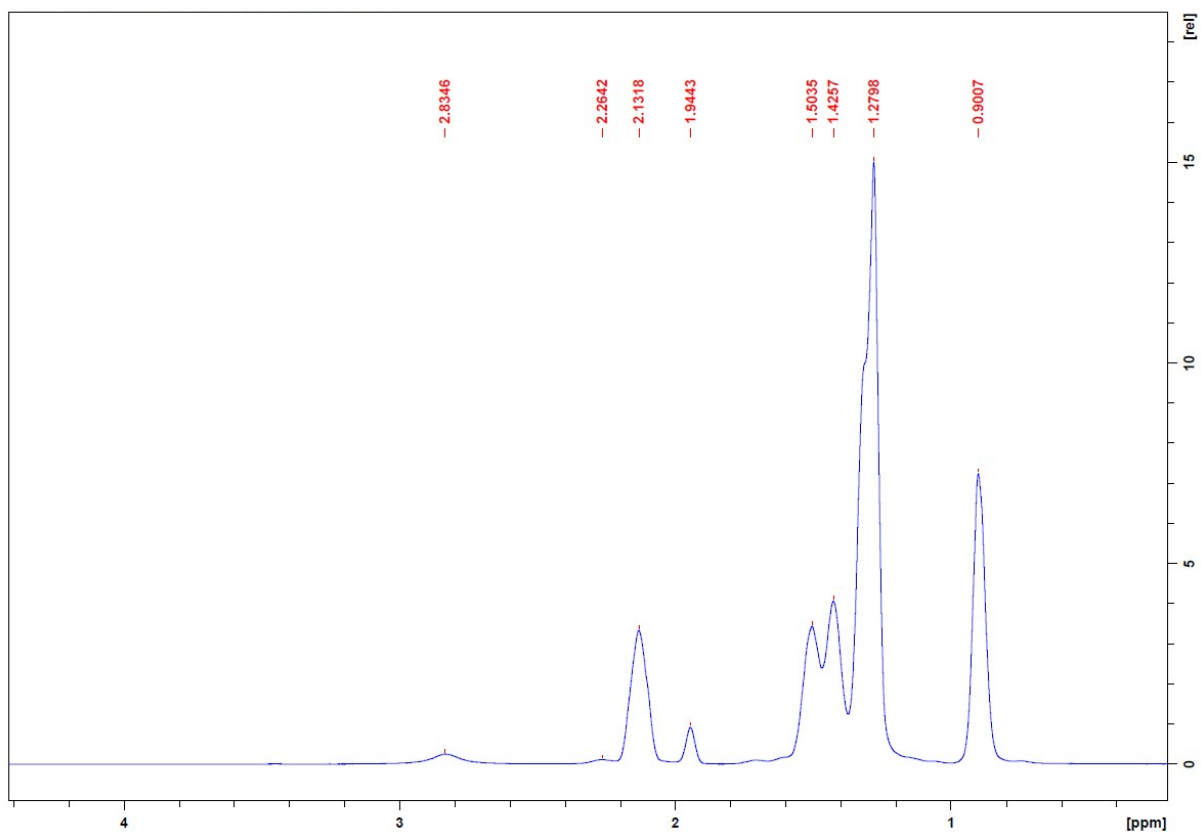

**Figure S1 :** <sup>1</sup>H NMR spectrum of commercial Cyphos IL 101.

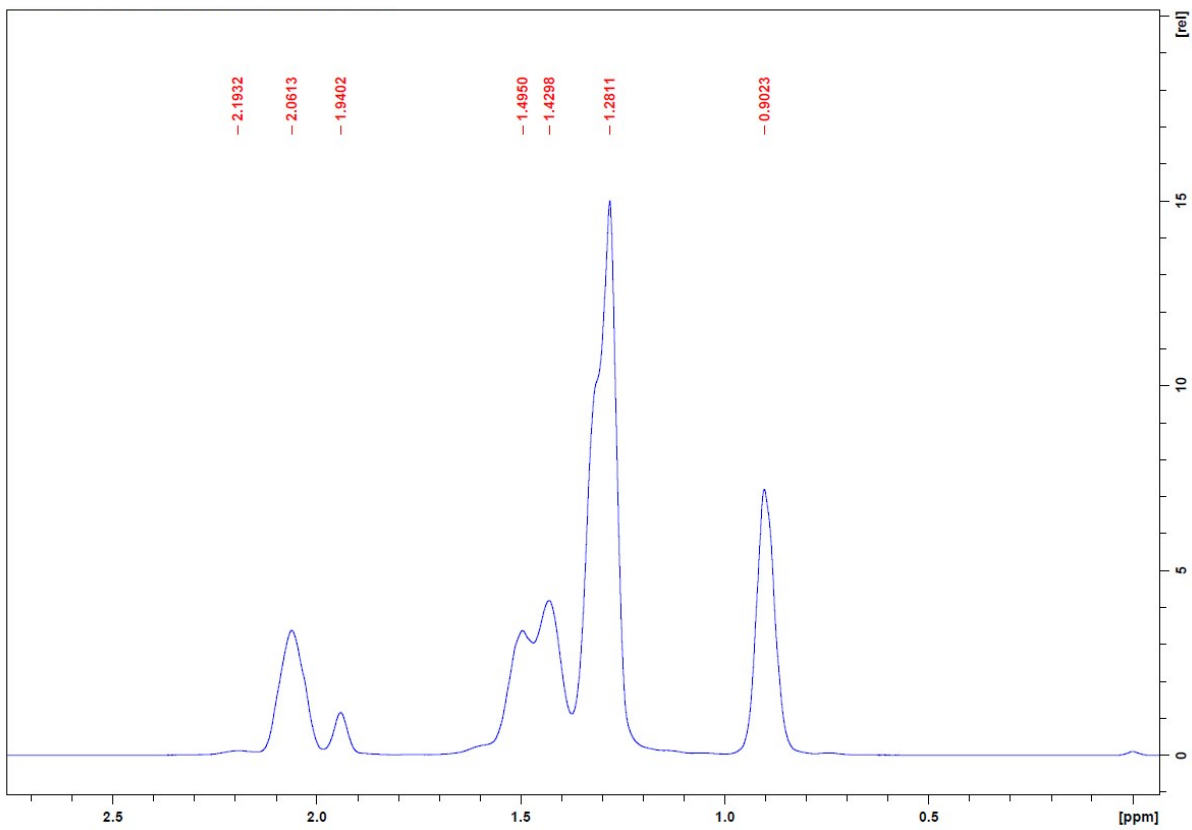

**Figure S2 :** <sup>1</sup>H NMR spectrum of the ionic liquid phase (Cyphos IL 101) after extraction. Initial aqueous phase:  $[\text{Ni}]_{\text{aq,in}} = 0.5 \text{ g}\cdot\text{L}^{-1}$ ,  $[\text{Co}]_{\text{aq,in}} = 0.5 \text{ g}\cdot\text{L}^{-1}$ ,  $[(\text{NH}_4)_2\text{SO}_4]_{\text{aq,in}} = 3 \text{ M}$ ,  $[\text{H}_2\text{SO}_4]_{\text{aq,in}} = 4 \text{ M}$ . A/O = 1:1,  $T_{\text{shaking}} = 25 \text{ }^\circ\text{C}$ .

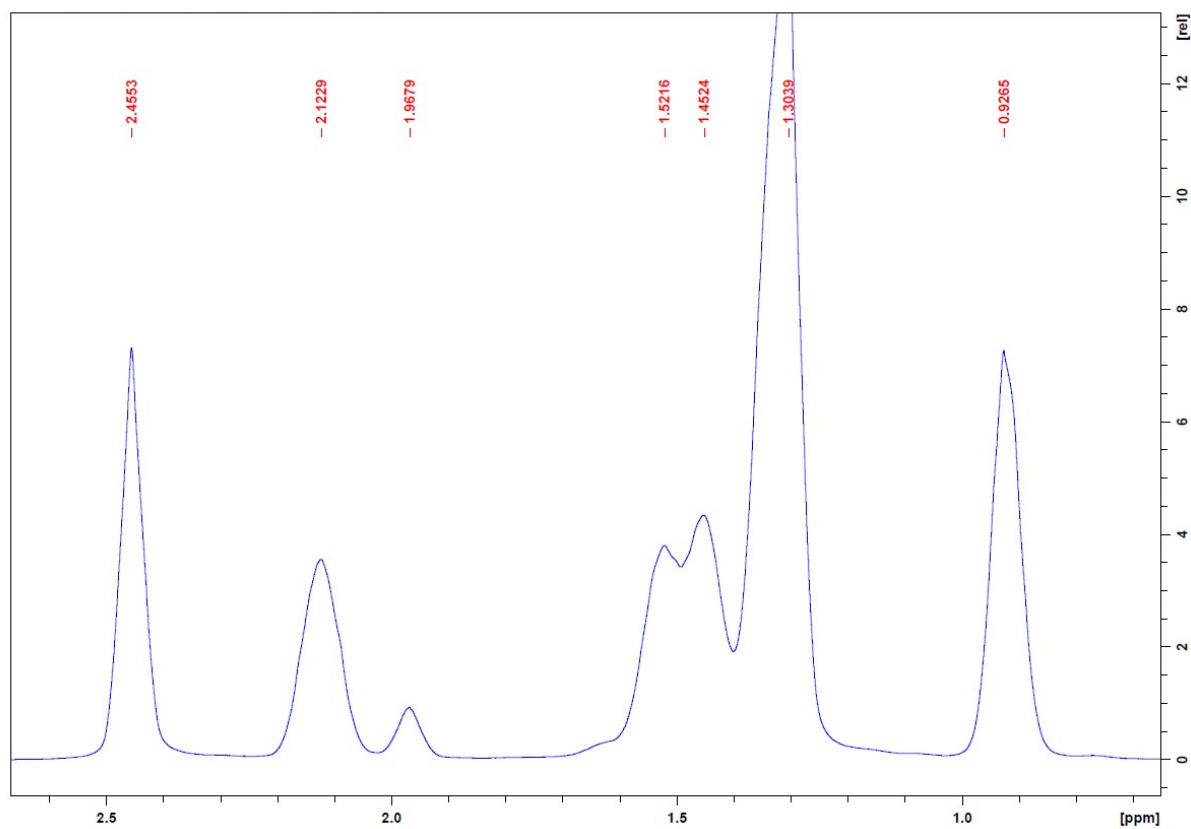

**Figure S3** :  $^1\text{H}$  NMR spectrum of the ionic liquid phase (Cyphos IL 101) after regeneration and neutralisation.

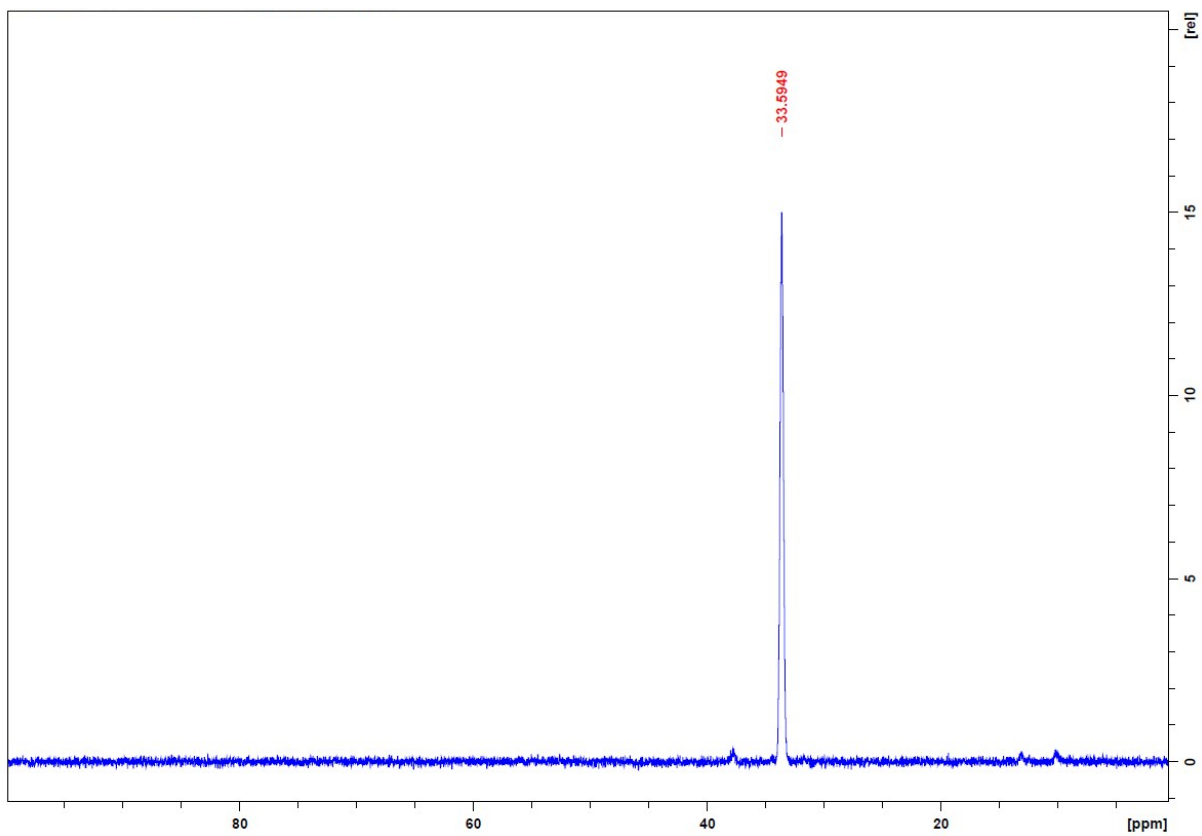

**Figure S4 :**  $^{31}\text{P}$  NMR spectrum of commercial Cyphos IL 101.

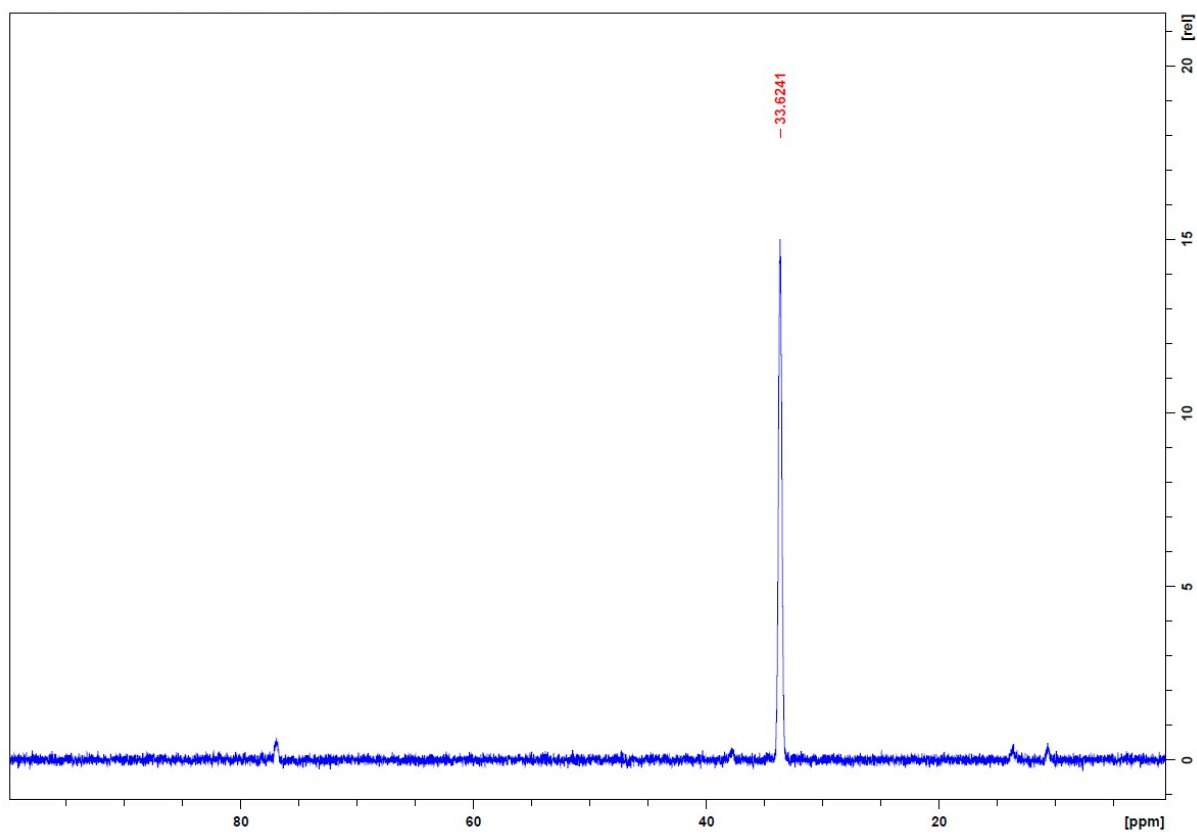

**Figure S5 :**  $^{31}\text{P}$  NMR spectrum of the ionic liquid phase (Cyphos IL 101) after extraction. Initial aqueous phase:  $[\text{Ni}]_{\text{aq,in}} = 0.5 \text{ g}\cdot\text{L}^{-1}$ ,  $[\text{Co}]_{\text{aq,in}} = 0.5 \text{ g}\cdot\text{L}^{-1}$ ,  $[(\text{NH}_4)_2\text{SO}_4]_{\text{aq,in}} = 3 \text{ M}$ ,  $[\text{H}_2\text{SO}_4]_{\text{aq,in}} = 4 \text{ M}$ . A/O = 1:1,  $T_{\text{shaking}} = 25 \text{ }^\circ\text{C}$ .

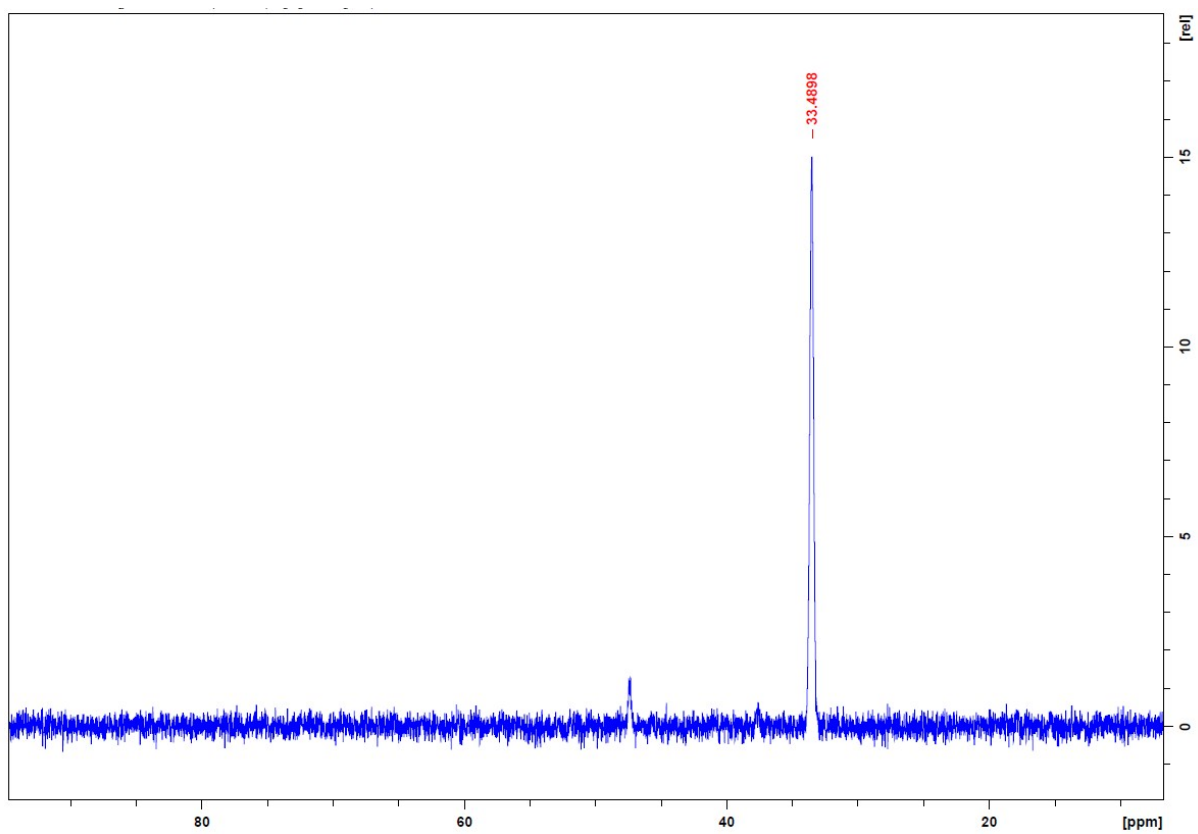

**Figure S6 :**  $^{31}\text{P}$  NMR spectrum of the ionic liquid phase (Cyphos IL 101) after regeneration and neutralisation.
